# Supplementary material for: Malaria and Malnutrition: Kwashiorkor Associated with Low Levels of Parasitaemia
Source: Malar Res Treat. 2018 Sep 27;2018:7153173. doi: 10.1155/2018/7153173 (PMC6247571; doi:10.1155/2018/7153173)
Supplement: Supplementary Materials — Data of the study is available as a supplemental excel file. [file 7153173.f1.xlsx]

## Sheet: Base data
No	K K/M M	LOG PARAS	ALB (g/L)	Hgb (g/L)	TEMP (cent)	WEIGHT (kg)	LENGHT (cm)	Age (months)
1	K	1.30103	24	9	37.4	10.3	89	60
2		1.11394			36.4	4.9	66	10
3	M	0.69897	50		36.6		67
4		0		7	36.7	8.4	80	31
5	M	0.30103	40		37.5	4.9	64	8
6	K	0	18		37	6.7	77	27
7	M	1.51851	44	5	37	6.5	73	19
8	K/M	2.04922	26	7	36.6	7	73	24
9	K	0		5	35.5	6.8	73	24
10	K/M	1.97313	18	8	36.3	5.7	73	33
11	K	0		8	35.5	6.6	73	36
12	K	0.60206	12	7	36.9	10.5	83	39
13	M	2.20952	40		37	4.1	61	10
14	M	1.30103	32	5	35.8	5.7	63	9
15		1.32222	39		35.8	9		30
16	M	0	38	8	36.1	5.3	64	13
17	M	2.12057	25			8.2
18	K	0	40		36	11.7	87	36
19	K/M	2.23045	34	8	36.8	6.6	62	15
20	K	0.69897	30		35.9	7.8	74	31
21	K	0	11	8	35.7	7.5	73	29
22	K	1.27875	20	8	36.5	9.1	73	26
23	M	2.69897	43	8	36.7	3.6	60	7
24	M	2.0086	32	6	35.5	3.8	54	6
25	M	3.53148	18	4	38.7	4	54	6
26	M	0.30103	28	5	37	5.1	61	10
27	K/M	1.32222	26	10	36.7	7.8	76	24
28	M	1.32222	26	7	36.2	4.3	63	12
29	M	1.07918	32	7	36.6	5	62	9
30	K	0.30103	19	8	36.2	7.2	75	24
31	K	1.25527	40	6	36.1	7.8	69	20
32	K	0		7	36.3	7	75	17
33	M	1.36173		6	36.1	7.9	74	27
34	M	1.23045	34	5.6	36.2	8.3	81	35
35	K	0		9	37.4	5.5	62	8
36	M	0		6	36.2	7.5	70	17
37	K	0.60206	6	8	36.3	9.8	82	28
38	K	0	20	8	36.4	7.1	73	21
39	K	2.9345	30	9	36.3	7.3	74	20
40	K/M	2.98588	24	6	36.6	8.6	87	42
41	K/M	0.778151	8
42	K/M	0		6	36.9	6	43	11
43	M	0	24	9	36.3	6.4	74	30
44	K/M				36.2	6.5	73	32
45	M	2.35025	36	7	36.9	4.9	62	10
46	M	1.77815	40	6	36.2	6.7	68	18
47	K	2.04532		9	36.3	7.2	74	20
48	K/M	2.82217	30	7	36.8	6.9	70	18
49	M	1.73239	42	8	36.2	6.9	73	48
50	M	3.29358		7	36.8	3.8	57	10
51	M	0.60206	34	8	36	3.8	56	6
52	M	1	35	4	35.9	8.2	77	27
53	M	1.80618		8	36.9	4	59	12
54	K/M	3.60206	35	4	36.5	5.6	63	11
55	K/M	3.01284	36	8	36.5	4.9	63	10
56	M	2.82737	39	5	36.4	5	61	6
57	M	2.76042		7	37	7	72	19
58	M	1.43136	55	5	35.7	6.5	69	17
59	M	3.60206	33	5	35	6.5	68	14
60	M			4	36.3	6.3	66	12
61	M	1.6902		4	34.4	4.6	61	11
62	M	1.57978		4	36.8	4.8	62	10
63	M	0.30103		5	35.4	5.4	61	8
64	M	2.61278	44	5.5	36.1	6.9	66	20
65	M	2.68485		5	36.8	5	63	8
66	M	1.17609		6	35.8	4.4	63	10
67	M	2.40483	45	6	36.8	4.4	59	9
68	M	2.73719	44	8	36.7	4.2	58	9
69	M	3.14768		4	35.1	6.2	66	12
70	K	0		4	36.7	8.1	73	21
71	M	2.31387		4	36.8	5.8	66	10
72	M	2.69197			36.4	7.2	72	24
73	M	3.76886	36	6.5	36	4.7	61	9
74	M	1.53148	59	6	36.8	6.4	64	10
75	M	0	42	6.5	36.1	3.8	55	6
76	K/M	0.778151	48	7	36.3	5.4	57	6
77	M	2.30103			37.6	8.3	80	28
78	M	2.07918	40	7	36.8	4.7	64	7
79	K	0		4	36.8	7.4	72	12
